# Supplementary material for: Interference and co-existence of staphylococci and Cutibacterium acnes within the healthy human skin microbiome
Source: PubMed Central journal article supplement (PMC9452508; doi:10.1038/s42003-022-03897-6), 2022-09-07
Supplement: 42003_2022_3897_MOESM3_ESM.pdf [file 42003_2022_3897_MOESM3_ESM.pdf]

## Description of Additional Supplementary Files

**File name:** Supplementary Data 1

**Description:** Relative abundances (in %) of staphylococci in 93 samples.

**File name:** Supplementary Data 2

**Description:** Accession numbers and sequence types of 69 *S. epidermidis* genomes sequenced in this study.

**File name:** Supplementary Data 3

**Description:** Relative abundances (in %) of *C. acnes* SLST types in 113 samples.

**File name:** Supplementary Data 4

**Description:** Differentially expressed genes of *S. epidermidis* HAF242 (SE): growth of SE in coculture with *C. acnes* 30.2.L1 (D-class) versus growth of SE in co-culture with *C. acnes* DSM1897 (A-class).

**File name:** Supplementary Data 5

**Description:** Differentially expressed genes of *S. epidermidis* HAF242 (SE): growth of SE in coculture with *C. acnes* DSM1897 (A-class) versus growth of SE in monoculture.

**File name:** Supplementary Data 6

**Description:** Differentially expressed genes of *S. epidermidis* HAF242 (SE): growth of SE in coculture with *C. acnes* 30.2.L1 (D-class) versus growth of SE in monoculture.

**File name:** Supplementary Data 7

**Description:** Origin of bacterial isolates (n=572) obtained in this study.

**File name:** Supplementary Data 8

**Description:** Database accession numbers of 286 *S. epidermidis* genomes taken for phylogenetic analyses of this study.

**File name:** Supplementary Data 9

**Description:** Accession numbers and SLST type assignments of 75 *C. acnes* genomes included in the pan-genome analysis of this study.

**File name:** Supplementary Data 10

**Description:** raw data for Fig. 1c, 2c, 4c, 5c, S4.
